# Supplementary material for: Air temperature and precipitation constraining the modelled wetland methane emissions in a boreal region in Northern Europe
Source: Copernicus journal article supplement (doi:10.5194/egusphere-2023-2873), 2024-01-15
Supplement: Supplementary file 1 [file egusphere-2023-2873-supplement.pdf]

Supplemental figures and tables.

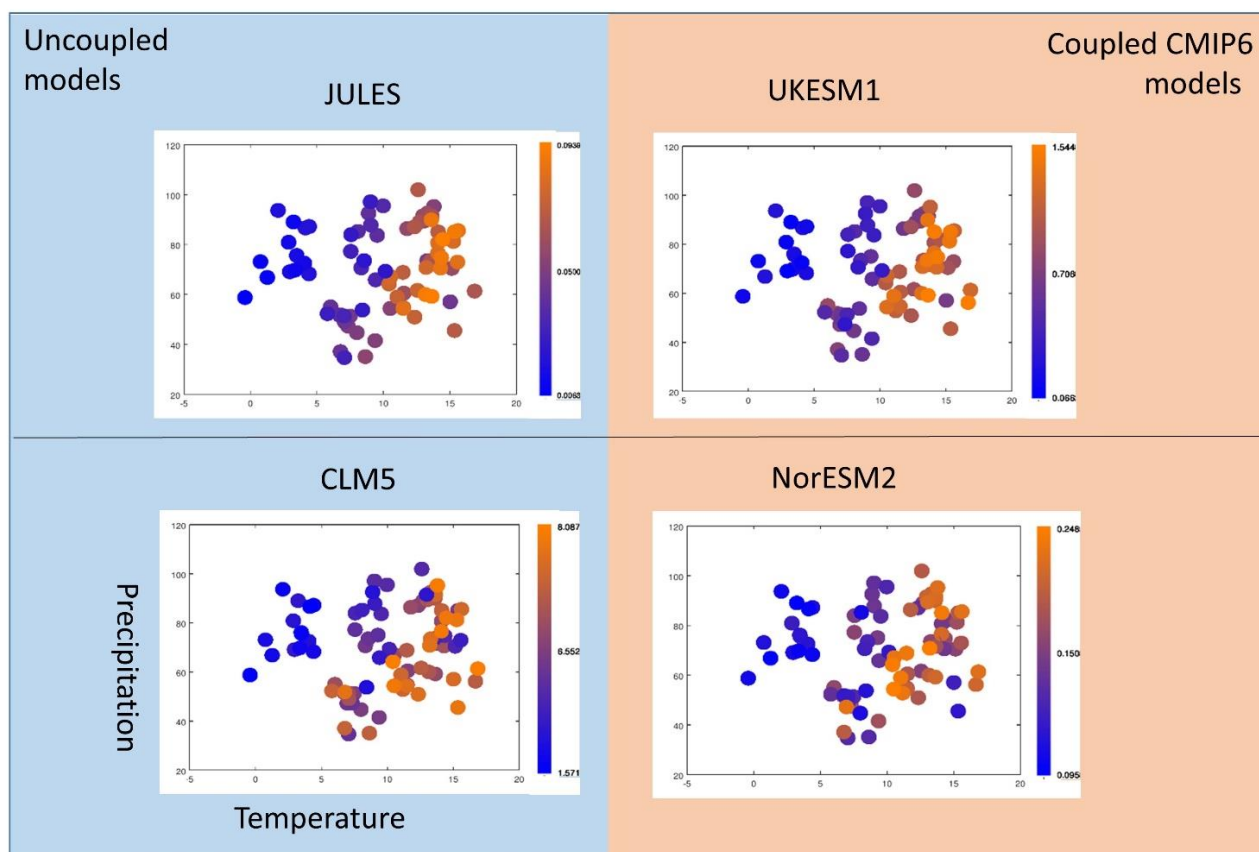

5 **Figure S1.** Temperature and precipitation responses of wetland methane emissions in Fennoscandia from JULES ecosystem model, uncoupled (left) and coupled (right) with UKESM1, and CLM5 model, uncoupled (left) and coupled (right) with NorESM2. Circles refer to monthly averages in May - October during years 2000-2017.

| CTE-CH4   | Posterior emission |         |        | Posterior/prior | flux    | multiplier |
|-----------|--------------------|---------|--------|-----------------|---------|------------|
| Prior     | R2 Temp            | R2 Prec | R2 T&P | R2 Temp         | R2 Prec | R2 T&P     |
| LPX-Bern  | 0.01               | 0.57    | 0.57   | 0.48            | 0.15    | 0.59       |
| JSBACH-H  | 0.72               | 0.06    | 0.75   | 0.01            | 0.38    | 0.40       |
| GCP-prior | 0.48               | 0.33    | 0.75   | 0.09            | 0.05    | 0.12       |

10 **Table S1.** Proportion of explained CH<sub>4</sub> emission and flux multiplier variances by temperature and precipitation. Flux results are from CTE-CH<sub>4</sub> inversion model using three different priors (LPX-Bern, JSBACH-H and GCP-prior).

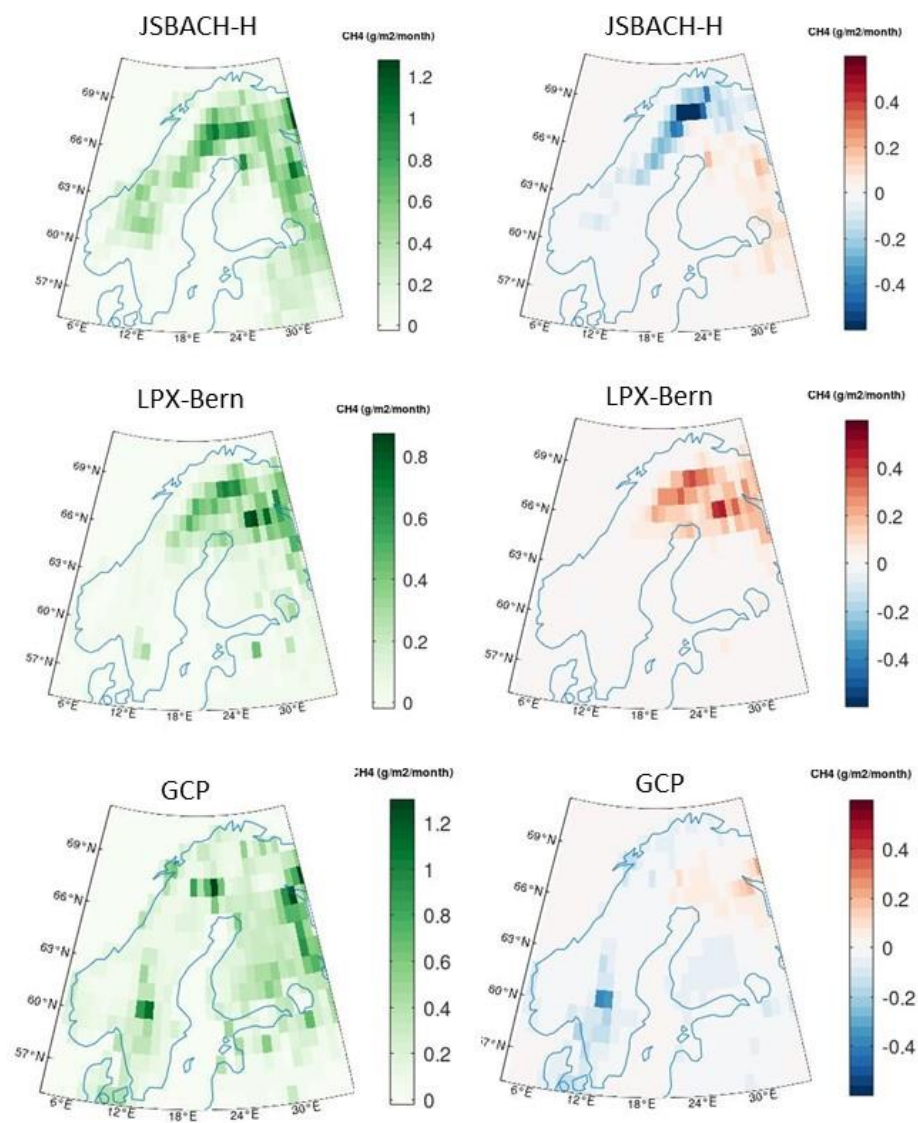

**Figure S2. The posterior methane fluxes estimated by CTE-CH<sub>4</sub> using JSBACH-H, LPX-Bern and GCP as priors (left column), and the difference between posterior and prior fluxes (right column).**

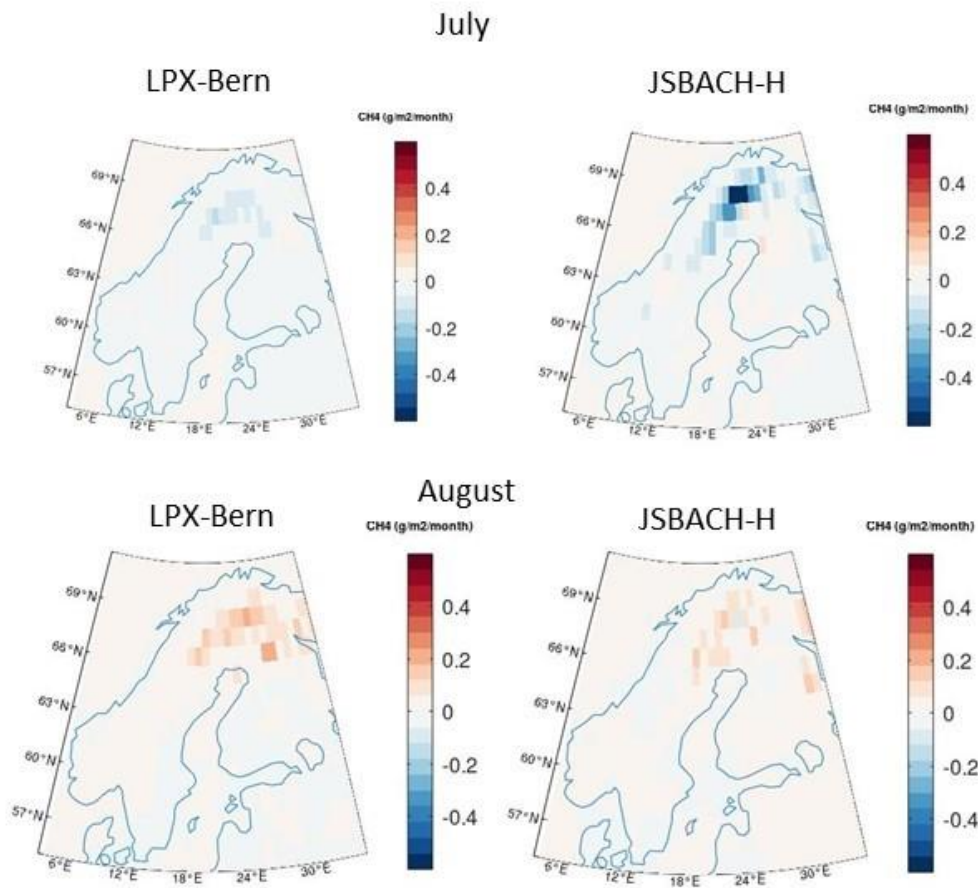

15

**Figure S3. The deviation of the monthly posterior - prior flux adjustment, estimated by CTE-CH4 and using JSBACH-H or LPX-Bern as priors, from the seasonal average flux adjustment. The deviation was calculated as follows:  $(F_{\text{post,month}} - F_{\text{prior,month}}) - (F_{\text{post, three-month average}} - F_{\text{prior, three-month average}})$ . Thus, in the case of JSBACH-H where seasonal average emissions were decreased in the posterior, they were decreased less in August and the deviation was positive. In the case of LPX-Bern the seasonal average emissions were increased in the posterior, and they were increased more in August, resulting in positive deviation.**

20
